# Supplementary material for: A programmed wave of uridylation-primed mRNA degradation is essential for meiotic progression and mammalian spermatogenesis
Source: PubMed Central journal article supplement (PMC6420129; doi:10.1038/s41422-018-0128-1), 2019-01-07
Supplement: NIHMS80609-supplement-2.pdf [file NIHMS80609-supplement-2.pdf]

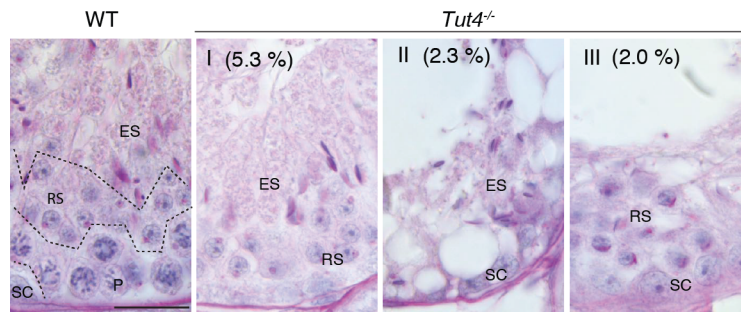

**Supplementary Figure 2. *Tut4*<sup>-/-</sup> testes show a low frequency of aberrant seminiferous tubules.** Micrographs of PAS-stained sections from WT and *Tut4*<sup>-/-</sup> mice seminiferous tubules. Panel I, tubules without primary spermatocytes. Panel II, tubules with Sertoli cells and some elongated spermatids. Panel III, tubules with other aberrant morphologies. The frequency of the different types of aberrant tubules is indicated in parenthesis. Different cell types are indicated: ES, elongated spermatids; RS, round spermatids; P, pachytene cells; SC, Sertoli cells. Scale bar, 20  $\mu$ m.
