# Supplementary material for: A programmed wave of uridylation-primed mRNA degradation is essential for meiotic progression and mammalian spermatogenesis
Source: PubMed Central journal article supplement (PMC6420129; doi:10.1038/s41422-018-0128-1), 2019-01-07
Supplement: NIHMS80609-supplement-3.pdf [file NIHMS80609-supplement-3.pdf]

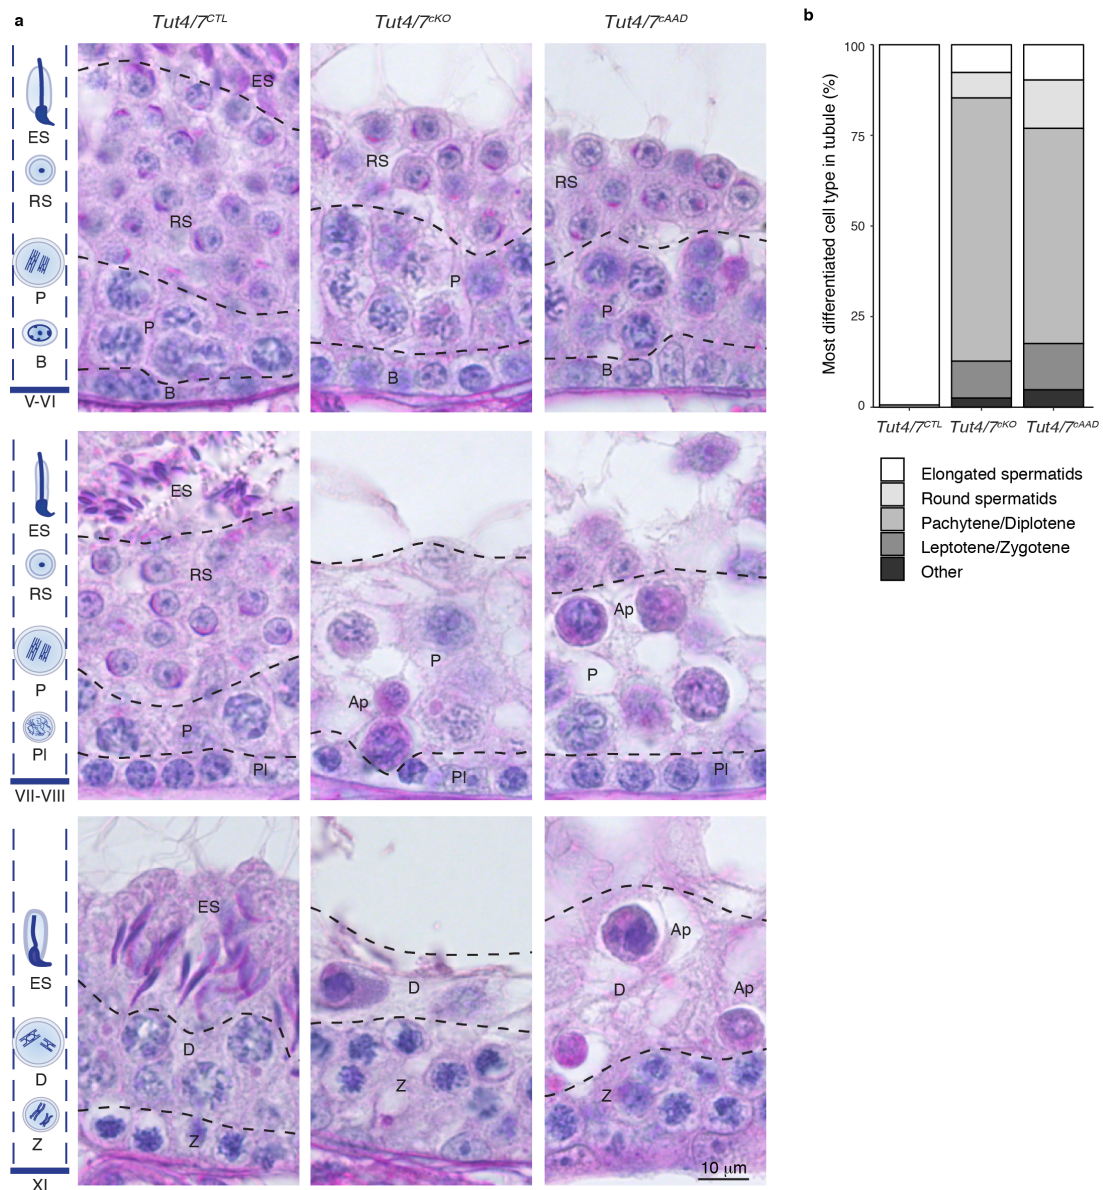

**Supplementary Figure 3. T<sub>UT</sub>4/7-deficiency results in late pachytene spermatogenic arrest. a.** PAS staining of tubules at stages V-VI, VII-VIII or XI of the seminiferous cycle from *Tut4/7<sup>CTL</sup>*, *Tut4/7<sup>CKO</sup>* and *Tut4/7<sup>CKO</sup>* animals. On the left, a schematic representation of the cell layers present at the different stages is presented. ES, elongating spermatids; RS, round spermatids; P, pachytene cell; B, B spermatogonia; Pl, pre-leptotene cell; D, diplotene cell; Z, zygotene cell and Ap, apoptotic cell. **b.** The percentages of most differentiated cell type across seminiferous tubules from *Tut4/7<sup>CTL</sup>*, *Tut4/7<sup>CKO</sup>* and *Tut4/7<sup>cAAD</sup>* animals are shown. (Animals per genotype, n=3; Tubules per animal, n≥50.)
