# Supplementary material for: A programmed wave of uridylation-primed mRNA degradation is essential for meiotic progression and mammalian spermatogenesis
Source: PubMed Central journal article supplement (PMC6420129; doi:10.1038/s41422-018-0128-1), 2019-01-07
Supplement: NIHMS80609-supplement-4.pdf [file NIHMS80609-supplement-4.pdf]

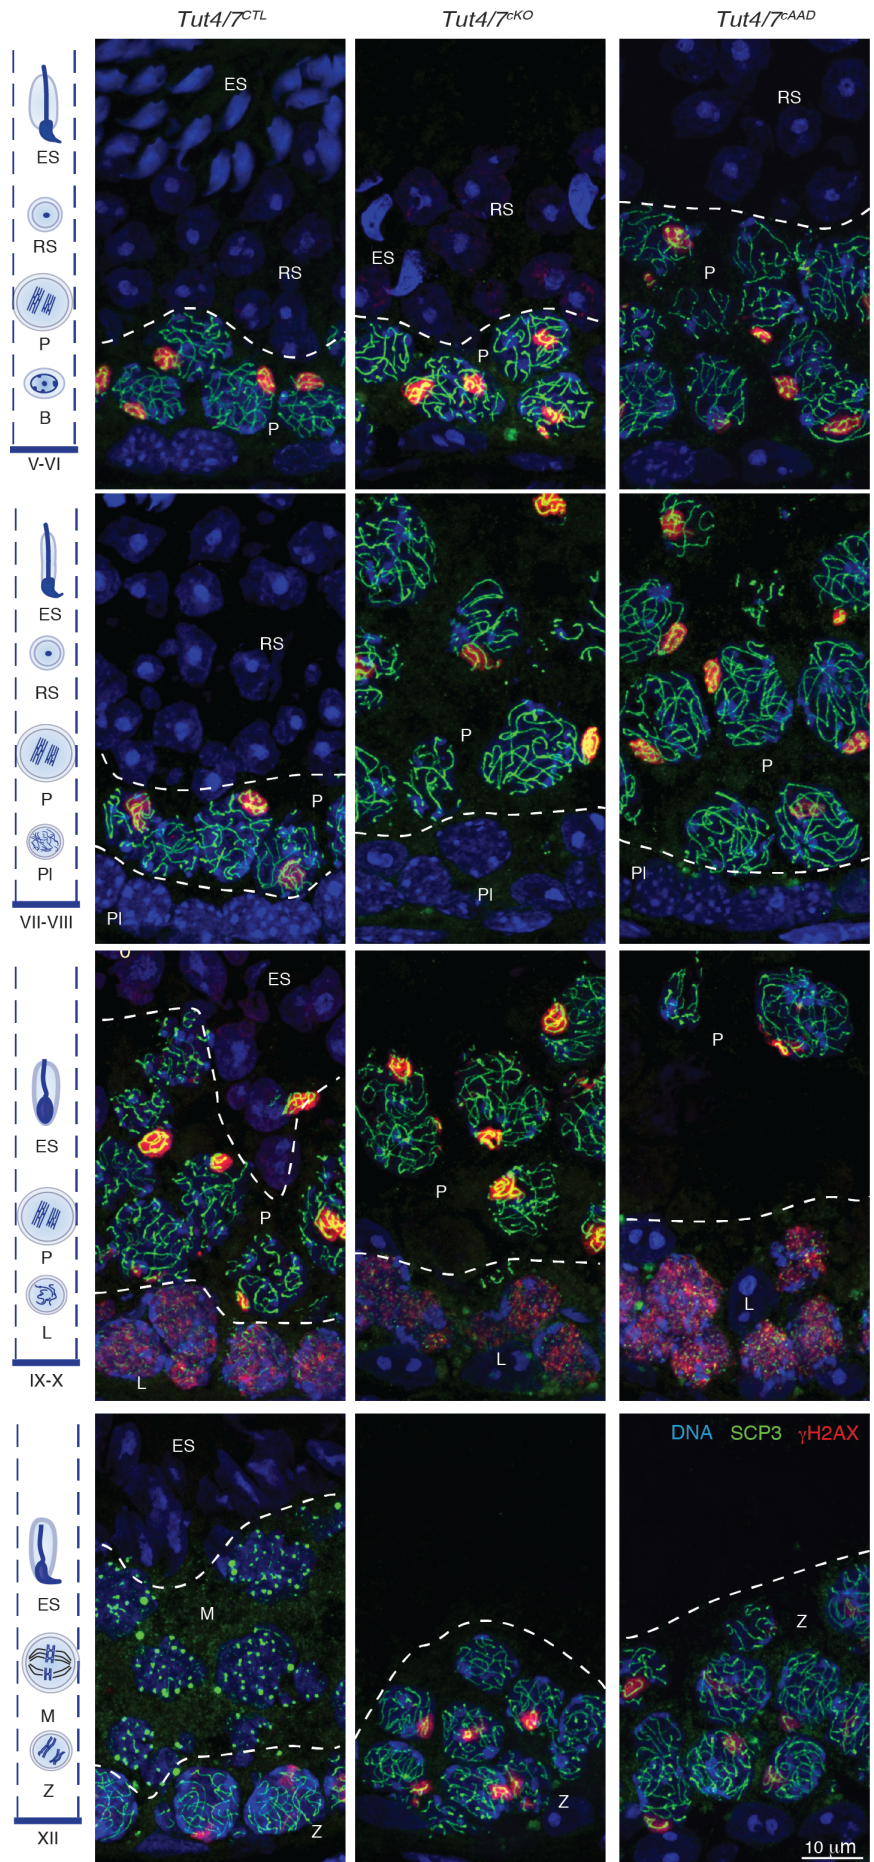

**Supplementary Figure 4. TUT4/7 are required for meiotic progression.**

Micrographs of seminiferous tubules from *Tut4/7<sup>CTL</sup>*, *Tut4/7<sup>CKO</sup>* and *Tut4/7<sup>cAAD</sup>* animals stained for SCP3 (green),  $\gamma$ H2AX (red) and DNA (blue) are shown. Tubules from stages V-VI, VII-VIII, IX-X and XII are presented for the indicated genotypes. Dashed lines delimit cells layers. On the left, schematic representations of the stages are depicted. (ES, elongated spermatid; RS, round spermatid; P, pachytene spermatocyte; Pl, pre-leptotene spermatocyte, L, leptotene cell; M, metaphase I cell; Z, zygotene spermatocyte). Scale bar, 10  $\mu$ m.
