# Supplementary material for: A programmed wave of uridylation-primed mRNA degradation is essential for meiotic progression and mammalian spermatogenesis
Source: PubMed Central journal article supplement (PMC6420129; doi:10.1038/s41422-018-0128-1), 2019-01-07
Supplement: NIHMS80609-supplement-5.pdf [file NIHMS80609-supplement-5.pdf]

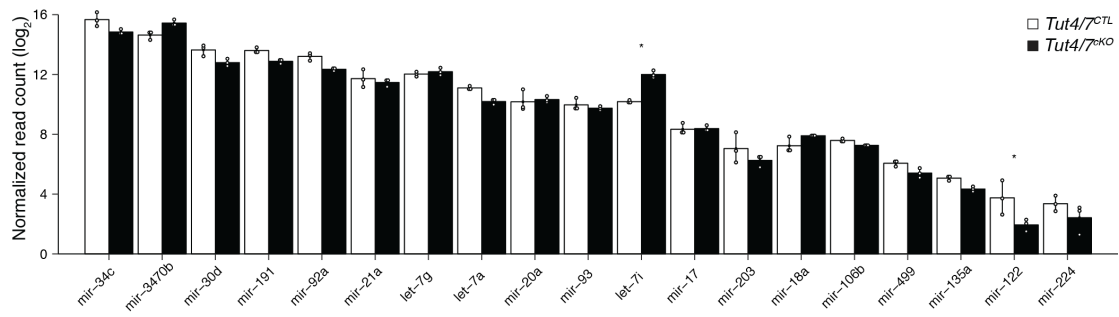

**Supplementary Figure 5. miRNA expression in *Tut4/7<sup>CTL</sup>* and *Tut4/7<sup>cKO</sup>* pachytene spermatocytes.** Normalized read count of the indicated miRNAs in *Tut4/7<sup>CTL</sup>* (white) and *Tut4/7<sup>cKO</sup>* (black) spermatocytes is presented. The height of the bar indicates the mean read count and the error bar the read count range. Each dot represents a biological replicate. miRNAs significantly changing more than two-fold ( $P < 0.01$ ) are indicated with a star.
