# Supplementary material for: A programmed wave of uridylation-primed mRNA degradation is essential for meiotic progression and mammalian spermatogenesis
Source: PubMed Central journal article supplement (PMC6420129; doi:10.1038/s41422-018-0128-1), 2019-01-07
Supplement: NIHMS80609-supplement-6.pdf [file NIHMS80609-supplement-6.pdf]

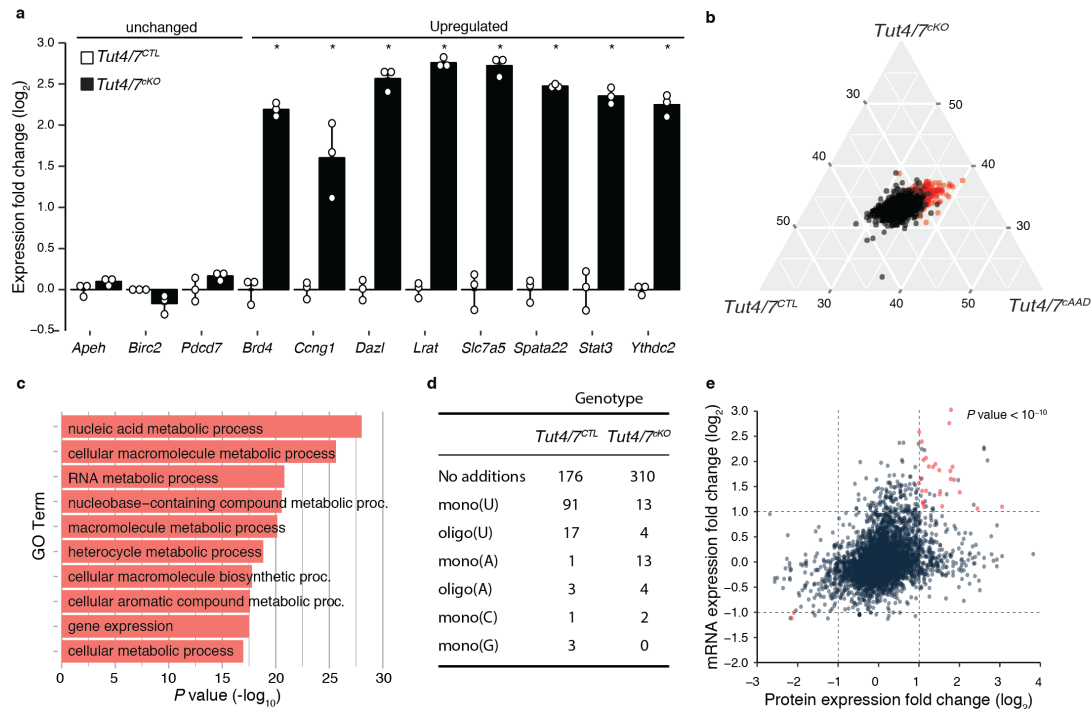

**Supplementary Figure 6. The uridylation activity of TUT4/7 is required for mRNA downregulation.** **a**, qPCR analysis of different transcripts in *Tut4/7<sup>CTL</sup>* (white) vs *Tut4/7<sup>cKO</sup>* (black) pachytene spermatocytes is shown. The height of the bars represents the mean fold change, and the error bars the range. Each dot represents a biological replicate. Transcripts upregulated or unchanged in the array profiling are indicated. mRNAs that significantly change more than two-fold ( $P < 0.01$ ) are indicated with a star. **b**, Ternary plot of mRNA expression levels from *Tut4/7<sup>CTL</sup>*, *Tut4/7<sup>cKO</sup>* and *Tut4/7<sup>cAAD</sup>* pachytene cells. Upregulated transcripts in *Tut4/7<sup>cKO</sup>* and *Tut4/7<sup>cAAD</sup>* samples are highlighted in red ( $P < 0.05$  and fold-change  $> 2$ , moderated t-statistic adjusted; *Tut4/7<sup>CTL</sup>*,  $n=4$ ; *Tut4/7<sup>cKO</sup>*,  $n=3$ ; *Tut4/7<sup>cAAD</sup>*,  $n=4$ ). **c**, Gene ontology analysis of upregulated transcripts in TUT4/7-deficient pachytene cells. The enrichment for each term is shown. **d**, Number of histone transcripts with 3' end terminal additions in *Tut4/7<sup>CTL</sup>* and *Tut4/7<sup>cKO</sup>* pachytene spermatocytes. **e**, Scatter plot of mRNA vs protein expression fold change between *Tut4/7<sup>CTL</sup>* and *TUT4/7<sup>cKO</sup>* pachytene spermatocytes. Genes with proteins and transcript simultaneously changing (adjusted  $P < 0.01$ ) more than two-fold are highlighted in red. The sensitivity of our mass spectrometry analysis allowed us to identify a total of 3604 proteins.

177 out of the 732 genes upregulated at the transcript level were detected. While only 1 in 40 genes with not upregulated transcripts show upregulation at the protein level, the ratio increases to 1 in 6 for genes with upregulated transcripts. The significance of the protein and transcript upregulation dependency evaluated using a Pearson's Chi-squared test is indicated at the panel top.
